# Supplementary material for: Health-Related Quality of Life in Adult Patients with Common Variable Immunodeficiency Disorders and Impact of Treatment
Source: Springer Nature journal article supplement (doi:10.1007/s10875-017-0404-8), 2017-05-23

### Unadjusted model

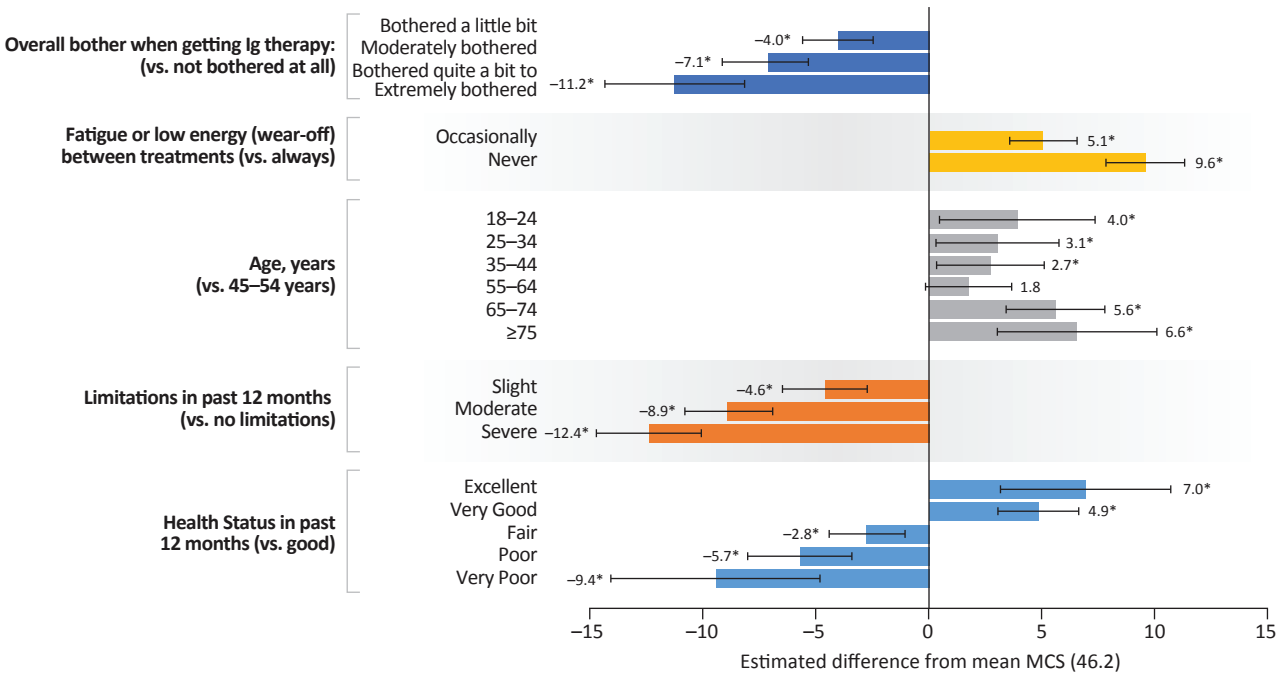

### Adjusted model

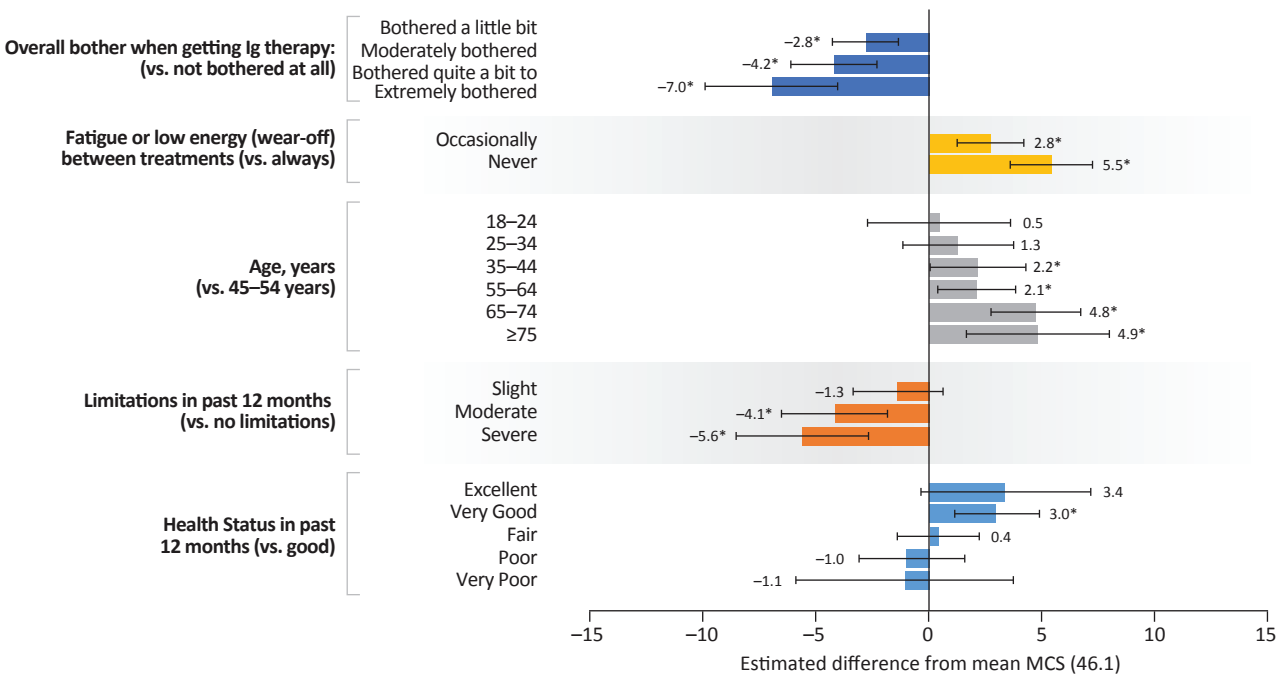

Supplement: MOESM10 [file 12309436]
